# Supplementary material for: Health-related quality of life in adult males with lower urinary tract symptoms
Source: Springer Nature journal article supplement (doi:10.1007/s11136-019-02205-w), 2019-05-13
Supplement: MOESM1 [file 16721174]

**Supplementary file 1. [The analytic method of weight value]**

Each weight value was calculated as below;

1. Household

*Whi = Mhi/nhi = ehi∙ Nhi /nhi*

*Nhi* = *i* number of household by housing type (general house or Apartment) in *h* (district/street/village)

*Mhi* = *i* number of eligible household by housing type (general house or Apartment) in *h* (district/street/village)

*nhi* = *i* number of surveyed household in *h* (district/street/village)

*ehi* = *i* eligible household ratio for survey in *h* (district/street/village)

2. Personal

*Whijkl = Whijk ⅹ Phijk/phijk*

*h*: district/street/village

*i*: type of housing (General house or Apartment)

*j*: sample area

*k*; household

*l*; the number of household member

*Phijk*: the number of household members aged 19 or older

*phijk*: the number of surveyed household members aged 19 or older

(3) Adjusted weight (weight value being adjusted the population structure by sex and age group based on the resident registration population)

*W‘hijkl = BFd ∙ Whijkl*

*BFd* = *d* (by sex and age group) the resident registration population /(∑*h*∑*i*∑*jkl Whijkl I d* ∈according to age, sex)
